# Supplementary material for: Exploring or Avoiding Novel Food Resources? The Novelty Conflict in an Invasive Bird
Source: PLoS One. 2011 May 18;6(5):e19535. doi: 10.1371/journal.pone.0019535 (PMC3097186; doi:10.1371/journal.pone.0019535)
Supplement: Table S1 — Loadings of the PCA on morphological variables. (DOC) [file pone.0019535.s002.doc]

**Supporting Information**

**Exploring or avoiding novel food resources? The novelty conflict in an invasive bird**

Daniel Sol1,2*, Andrea S. Griffin3, Ignasi Bartomeus1 and Hayley Boyce3

1Centre for Ecological Research and Forestry Applications (CREAF) Autonomous university of Barcelona, 08193 Bellaterra, Catalonia, Spain

2Center for advanced Studies of Blanes (CEAB), Spanish National Research Council (CSIC)

3School of Psychology, University of Newcastle, Callaghan, NSW 2308
Australia

**Supplementary table S1**

Table S1: Loadings of the PCA on morphological variables.

| Variable | Comp. 1 | Comp. 2 | Comp. 3 | Comp. 4 |
| --- | --- | --- | --- | --- |
| Bill | - | 0.919 | 0.39 | - |
| Tarsus | - | 0.351 | -0.771 | -0.523 |
| Tail | -0.989 | - | 0.141 | - |
| Wing | - | 0.182 | -0.483 | 0.851 |
| Proportion of Variance | 0.656 | 0.229 | 0.097 | 0.017 |
